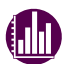

# Metabolomics Reveals Broad-Scale Metabolic Perturbations in Hyperglycemic Mothers During Pregnancy

Denise M. Scholtens,<sup>1</sup> Michael J. Muehlbauer,<sup>2</sup> Natalie R. Daya,<sup>1</sup> Robert D. Stevens,<sup>2,3</sup> Alan R. Dyer,<sup>1</sup> Lynn P. Lowe,<sup>1</sup> Boyd E. Metzger,<sup>1</sup> Christopher B. Newgard,<sup>2,3</sup> James R. Bain,<sup>2,3</sup> and William L. Lowe Jr.,<sup>1</sup> for the HAPO Study Cooperative Research Group

## OBJECTIVE

To characterize metabolites across the range of maternal glucose by comparing metabolomic profiles of mothers with high and low fasting plasma glucose (FPG).

## RESEARCH DESIGN AND METHODS

We compared fasting serum from an oral glucose tolerance test at ~28 weeks' gestation from 67 Northern European ancestry mothers from the Hyperglycemia and Adverse Pregnancy Outcome (HAPO) Study with high (>90th percentile) FPG with 50 mothers with low (<10th percentile) FPG but comparable BMI. Metabolic data from biochemical analyses of conventional clinical metabolites, targeted mass spectrometry (MS)-based measurement of amino acids, and nontargeted gas chromatography/MS were subjected to per-metabolite analyses and collective pathway analyses using Unipathway annotation.

## RESULTS

High-FPG mothers had a metabolic profile consistent with insulin resistance including higher triglycerides, 3-hydroxybutyrate, and amino acids including alanine, proline, and branched-chain amino acids (false discovery rate [FDR]-adjusted  $P < 0.05$ ). Lower 1,5-anhydroglucitol in high-FPG mothers suggested recent hyperglycemic excursions (FDR-adjusted  $P < 0.05$ ). Pathway analyses indicated differences in amino acid degradation pathways for the two groups (FDR-adjusted  $P < 0.05$ ), consistent with population-based findings in nonpregnant populations. Exploratory analyses with newborn outcomes indicated positive associations for maternal triglycerides with neonatal sum of skinfolds and cord C-peptide and a negative association between maternal glycine and cord C-peptide ( $P < 0.05$ ).

## CONCLUSIONS

Metabolomics reveals perturbations in metabolism of major macronutrients and amino acid degradation pathways in high- versus low-FPG mothers.

*Diabetes Care* 2014;37:158–166 | DOI: 10.2337/dc13-0989

<sup>1</sup>Feinberg School of Medicine, Northwestern University, Chicago, IL

<sup>2</sup>Sarah W. Stedman Nutrition and Metabolism Center, Duke University Medical Center, Durham, NC

<sup>3</sup>Duke University School of Medicine, Durham, NC

Corresponding author: Denise M. Scholtens, dscholtens@northwestern.edu.

Received 25 April 2013 and accepted 19 August 2013.

This article contains Supplementary Data online at <http://care.diabetesjournals.org/lookup/suppl/doi:10.2337/dc13-0989/-/DC1>.

© 2014 by the American Diabetes Association. See <http://creativecommons.org/licenses/by-nc-nd/3.0/> for details.

Maternal glucose metabolism during pregnancy differs from the pregravid state, as the mother must meet both her own and the growing fetus's energy needs in a setting of increasing insulin resistance (1,2). Fasting glucose decreases progressively throughout gestation, but insulin resistance increases from the end of the first trimester through the third trimester. As insulin resistance increases, basal and stimulated insulin secretion, postprandial glucose levels, and hepatic glucose production all increase compared with the nongravid state. Maternal hyperglycemia occurs because of greater insulin resistance together with the inability of  $\beta$ -cells to meet the insulin secretory demands of increased insulin resistance (3). Although placental secretion of cytokines and other factors are known to contribute to pregnancy-induced insulin resistance (4), the mechanisms underlying the insulin resistance and its metabolic consequences in pregnancy remain incompletely defined.

Rapidly developing metabolomics technologies offer an integrative "omics" perspective into human physiology. Targeted assays of chemically similar groups of metabolites, e.g., amino acids, using stable isotope-labeled internal standards, afford precise measurement of specific metabolites. Complementary nontargeted gas chromatography (GC)/mass spectrometry (MS)-based assays provide more encompassing summaries by measuring features defined by mass spectra and retention time, with subsequent compound identification via comparison with a library of possible matches (5). Reflecting contributions of both genetic and environmental factors (5), the metabolome is uniquely relevant for defining metabolic changes characteristic of maternal hyperglycemia in an effort to better define pregnancy-induced insulin resistance and its consequences.

Given the importance of maternal glycemia on both the intrauterine milieu and long-term maternal outcomes, we sought to characterize the metabolic milieu associated with maternal hyperglycemia. We sampled 117 mothers from the Hyperglycemia and

Adverse Pregnancy Outcome (HAPO) Study (6) with fasting plasma glucose (FPG) levels at the highest and lowest ends of the FPG distribution. Mothers with high FPG levels met criteria for gestational diabetes mellitus (GDM) using the new International Association of Diabetes and Pregnancy Study Groups (IADPSG) definition (7). Applied together, targeted and nontargeted metabolomics followed by pathway analyses point to metabolic cascades associated with maternal glycemia and shed light on factors underlying maternal insulin resistance, altered insulin secretion, and resulting hyperglycemia.

## RESEARCH DESIGN AND METHODS

We studied 117 HAPO mothers of northern European ancestry: 67 with high (>90th percentile) and 50 with low (<10th percentile) FPG levels according to the HAPO FPG distribution (6). Women were sampled to maintain comparable BMI, height, and gestational age for the two groups and were selected from the following HAPO field centers: Chicago, Illinois; Providence, Rhode Island; Cleveland, Ohio; Toronto, Canada; Belfast, U.K.; and Brisbane, Australia (Table 1).

### Data and Sample Collection

HAPO study methods were described previously (6,8). Eligible women underwent a 75-g oral glucose tolerance test (OGTT) between 24 and 32 weeks' gestation. Fasting, 1-h, and 2-h plasma glucose (PG); fasting and 1-h C-peptide; and HbA<sub>1c</sub> were measured. Additional fasting serum samples collected at the start of the OGTT were stored at  $-80^{\circ}\text{C}$  until the present metabolomics assays.

Insulin sensitivity using OGTT glucose and C-peptide ( $\text{IS}_{\text{OGTT C-pep}}$ ) was calculated according to the methodology of Radaelli et al. (9), with a numerator adjustment for scaling:  $\text{IS}_{\text{OGTT C-pep}} = 1,000/\sqrt{(\text{FPG} \times \text{fasting C-peptide} \times G \times C)}$ , where  $G$  and  $C$  are the means of fasting and 1-h PG (mg/dL) and C-peptide ( $\mu\text{g/L}$ ), respectively.

Maternal height, maternal weight, newborn birth weight, newborn sum of skinfolds, and cord blood glucose and C-peptide were measured using

standard procedures and calibrated equipment, and gestational age was determined as previously described (6,8). Demographic and lifestyle characteristics, age, parity, and self-identified ethnicity were collected via questionnaire.

Participants, caregivers, and HAPO study staff (except laboratory personnel) remained blinded to glucose values unless FPG was  $>5.8$  mmol/L, 2-h OGTT PG was  $>11.1$  mmol/L, random PG was  $\geq 8.9$  mmol/L, or any PG value was  $<2.5$  mmol/L. Unblinded participants were excluded.

### Conventional Metabolite Analyses

Conventional metabolites were measured on a Beckman-Coulter DxC600 autoanalyzer using reagents from Beckman (Brea, CA) (triglycerides and lactate) and Wako USA (Richmond, VA) (3-hydroxybutyrate). For free glycerol, we modified reagents by Roche (Indianapolis, IN) for glycerol-blanked triglycerides. To 84 mL of the Roche R1 reagent, we added 6.0 mg 4-aminoantipyrine dye (Sigma, St. Louis, MO). This assay was run by combining 250  $\mu\text{L}$  reagent with 20  $\mu\text{L}$  sample volume, calibrated against a glycerol standard (2.29 mmol/L) with detection at 520 nm after 5 min.

### Targeted and Nontargeted Metabolomics Assays

Targeted assays of amino acids using stable isotope-labeled internal standards were performed on an Acquity TQD Triple Quadrupole system (Waters, Milford, MA) (10). Methanolic supernatants from the amino acid assay were spiked with a retention-time-lock (RTL) internal standard of perdeuterated myristic acid, dried, prepared for nontargeted GC/MS by methoximation and trimethylsilylation (11), and run on a 6890N GC-5975 Inert MS (Agilent Technologies, Santa Clara, CA). Programmed-temperature vaporization in the inlet and post-run, mid-column, hot backflushing of the GC column minimized analyte decomposition, carryover, and fouling of GC and MS. GC/MS data were deconvoluted with AMDIS freeware, courtesy of the National Institute of Standards and Technology, Gaithersburg, Maryland (12), and

**Table 1—Characteristics of HAPO mothers with high and low FPG**

| Characteristic                   | High FPG                     | Low FPG                      | P     |
|----------------------------------|------------------------------|------------------------------|-------|
| <i>n</i>                         | 67                           | 50                           |       |
| Field center                     |                              |                              |       |
| Toronto                          | 26 (39)                      | 22 (44)                      | 0.01  |
| U.S.                             | 17 (25)                      | 4 (8)                        |       |
| Belfast                          | 16 (24)                      | 7 (14)                       |       |
| Brisbane                         | 8 (12)                       | 17 (34)                      |       |
| Parity                           |                              |                              |       |
| First child                      | 40 (60)                      | 37 (74)                      | 0.12  |
| Subsequent child                 | 27 (40)                      | 13 (26)                      |       |
| Smoker or drinker                |                              |                              |       |
| No                               | 53 (79)                      | 39 (78)                      | 1.00  |
| Yes                              | 14 (21)                      | 11 (22)                      |       |
| FPG (mg/dL)                      | 94.9 ± 5.6                   | 68.4 ± 2.1                   | —     |
| 1-h plasma glucose (mg/dL)       | 174.22 ± 23.9                | 91.8 ± 14.1                  | —     |
| 2-h plasma glucose (mg/dL)       | 135.6 ± 24.9                 | 85.4 ± 12.4                  | —     |
| FPG sample storage time (years)  | 7.9 ± 1.6                    | 7.5 ± 1.5                    | 0.11  |
| Maternal age at OGTT (years)     | 31.6 ± 5.6                   | 29.6 ± 5.5                   | 0.05  |
| Gestational age at OGTT (weeks)  | 28.3 ± 1.4                   | 28.1 ± 1.5                   | 0.68  |
| BMI at OGTT (kg/m <sup>2</sup> ) | 27.4 ± 2.8                   | 27.1 ± 2.5                   | 0.49  |
| Height at OGTT (cm)              | 165.4 ± 6.8                  | 165.2 ± 6.6                  | 0.84  |
| Fasting C-peptide (μg/L)         | 2.7 ± 0.9                    | 1.3 ± 0.6                    | <0.01 |
| 1-h C-peptide (μg/L)             | 10.4 ± 3.1                   | 6.8 ± 2.5                    | <0.01 |
| Insulin sensitivity              | 2.4 ± 0.9                    | 6.7 ± 2.5                    | <0.01 |
| HbA <sub>1c</sub> (%)*           | 5.0 ± 0.3 ( <i>n</i> = 65)   | 4.5 ± 0.3 ( <i>n</i> = 46)   | <0.01 |
| Newborn birth weight (g)         | 3,778.1 ± 418.4              | 3,442.9 ± 522.5              | <0.01 |
| Newborn sum of skinfolds (mm)    | 13.5 ± 3.0 ( <i>n</i> = 55)  | 13.3 ± 2.7 ( <i>n</i> = 39)  | 0.75  |
| Newborn cord C-peptide (μg/L)    | 1.3 ± 0.5 ( <i>n</i> = 59)   | 0.6 ± 0.3 ( <i>n</i> = 43)   | <0.01 |
| Newborn cord glucose (mg/dL)     | 79.3 ± 16.3 ( <i>n</i> = 58) | 76.1 ± 15.6 ( <i>n</i> = 43) | 0.33  |

Data are *n* (%) or means ± SD unless otherwise indicated. Categorical and continuous variables were compared across high- and low-FPG groups using Fisher exact tests and two-sample *t* tests, respectively. Differences in plasma glucose levels were not tested for statistical significance, since mean values in the two groups are different by design. Insulin sensitivity based on the OGTT glucose and C-peptide measures (IS<sub>OGTT C-pep</sub>) was calculated using the approach of Radaelli et al. (9), with an adjustment in the numerator for scaling purposes; specifically, IS<sub>OGTT C-pep</sub> = 1,000/[(FPG × fasting C-peptide × *G* × *C*), where *G* is the mean of FPG and 1-h PG and *C* is the mean of fasting and 1-h C-peptide. Glucose values are reported as mg/dL and C-peptide values as μg/L. \*Statistical testing for HbA<sub>1c</sub> was performed with values measured as %. The 5.0% high and 4.5% low FPG group means are equivalent to 31 and 26 mmol/mol, respectively.

parsed against peaks annotated using the Fiehn RTL spectral library (11) with additions from our laboratory.

Metabolites common across samples were tabulated, with peak areas log transformed and adjusted by scaling medians across two batches that differed due to temporal differences in sample analysis. Manual curation included correction of miscalls and identification of coeluting groups of

isomeric metabolites (e.g., pentitols, hexitols).

#### Statistical Analyses

##### High- Versus Low-FPG Group Comparisons

All statistical analyses were performed in R (2.15.2). Categorical variable frequencies and continuous variable means were compared for high- and low-FPG mothers using Fisher exact tests and two-sample *t* tests,

respectively. Women from U.S. HAPO field centers were grouped for analyses.

##### Conventional Metabolites and Targeted Amino Acids

Means and SDs were calculated for conventional metabolites and targeted amino acids for high- and low-FPG groups. One low-FPG mother was excluded from targeted analyses owing to outlying values for all analytes. Adjusted mean differences were estimated using linear regression with metabolite as the outcome, high- versus low-FPG status as the predictor of interest, and additional covariates for field center (referent, U.S.), parity (referent, first child), maternal and gestational age at OGTT, and fasting sample storage time. Additional adjustment for BMI and height at OGTT and drinking and/or smoking status was also examined. Exploratory linear regression models included newborn birth weight, newborn sum of skinfolds, and cord blood glucose and C-peptide as covariates, with and without adjustment for maternal FPG group.

##### Nontargeted Metabolites

When detectable, GC/MS nontargeted metabolite abundance is reported as log<sub>2</sub>-transformed peak areas. GC/MS values were frequently undetectable because of absence from the sample or presence below detectability. Metabolites were included for statistical analysis if levels were detected for at least half of either FPG group. High-versus low-FPG group differences were identified using a mixture model to jointly consider detectable metabolite levels and frequency of undetectable levels. The mixture model can be viewed as a combination of a logistic model for metabolite detectability and a linear model for metabolite abundance, with an iterative computational procedure to estimate coefficients for both models at the same time (13). Likelihood ratio nested model  $\chi^2$  tests were used to compare full models including high-versus low-FPG indicator variables in both the logistic and linear models with reduced models without the FPG variable. The linear model portion of the mixture model also included adjustment for the variables used in conventional metabolite and targeted amino acid linear regression analyses.

Within FPG group, 1,000 bootstrap samples were used to estimate parameter SEs. When fewer than five samples yielded undetectable metabolite levels, the logistic regression component of the mixture model was eliminated, yielding results consistent with straightforward linear models.

#### Power Calculations

With 67 women in the high-FPG group and 50 in the low-FPG group, we had 80% power at a nominal two-sided 1% Type I error to detect unadjusted differences in group means of  $\sim 0.64$  SDs. The Type I error rate was chosen to approximate false discovery rate (FDR) adjustment at  $P < 0.05$  for conventional metabolite and targeted amino acid analyses rather than strict family-wise error rate control. Nontargeted analyses were not formally powered.

#### Pathway Analyses

##### UniPathway Database

Pathway analyses used UniPathway annotation (<http://www.grenoble.prabi.fr/obiwarehouse/unipathway>) (14). UniPathway maps compounds to enzymatic reactions and then assembles nondivergent successions of reactions into linear subpathways, which are assembled into larger pathways and superpathways in a hierarchical organization.

GC/MS metabolites were mapped to UniPathway linear subpathways (ULSs) by translating to SMILES chemical structure representation using online software (15) and identifying matching groups using text comparison. Due to isomerism, matching groups were often comprised of multiple possible matches, particularly for sugars. Each possible match was considered for pathway analyses.

##### Pathway Enrichment Analyses

Pathway enrichment analyses used a self-contained gene set enrichment approach (16) using ULSs as compound "sets." For each ULS, the median mixture model likelihood ratio test statistic for all constituent compounds was compared with the distribution of medians for the same metabolites after random reshuffling of sample covariate vectors 1,000 times. Reported  $P$  values represent the number of permutation medians as or more extreme than the

observed median and were FDR adjusted (17).

## RESULTS

### High- Versus Low-FPG Group Comparisons

Characteristics of high- and low-FPG groups are reported in Table 1. Mean FPG levels were statistically different by design; higher 1-h and 2-h PG were also observed in the high- vs. low-FPG group. Fasting and 1-h C-peptide levels were also higher in the high-FPG group ( $P < 0.01$ ). BMI was similar at 28 weeks' gestation but, consistent with glucose and C-peptide differences, insulin sensitivity was approximately three times higher in low- relative to high-FPG mothers ( $P < 0.01$ ). HbA<sub>1c</sub> was also higher in the high-FPG group ( $P < 0.01$ ). Field center representation differed between the two groups ( $P = 0.01$ ), and there were borderline differences in parity, maternal age at OGTT, and sample storage time for high- versus low-FPG mothers. Rates of smoking or drinking, height, and gestational age at OGTT were comparable. Offspring of mothers in the high-FPG group had higher birth weight and cord C-peptide, although sum of skinfolds and cord glucose did not differ between the groups.

### Conventional Metabolites and Targeted Amino Acids

For conventional metabolites, high-FPG mothers had higher levels of triglycerides and 3-hydroxybutyrate than low-FPG mothers (Table 2). Unadjusted differences remained statistically significant after covariate adjustment and FDR correction. Lactate and glycerol levels trended higher in the high-FPG group.

Among targeted amino acids, alanine, proline, glutamine/glutamate, arginine, leucine/isoleucine, and asparagine/aspartate levels were higher in high- versus low-FPG mothers, with differences remaining statistically significant after covariate adjustment and FDR correction (Table 2). Phenylalanine, citrulline, and valine trended higher in high- versus low-FPG mothers. The remaining targeted amino acids were not significantly different in high- versus low-FPG groups.

### Nontargeted GC/MS Metabolites

Of 309 compounds identified in nontargeted assays, 130 were detectable in at least half of the samples from either FPG group. The mixture model identified 30 compounds/classes differing in detectability or abundance in the high- versus low-FPG groups, with FDR-corrected  $P < 0.05$  (Table 3).

Nontargeted GC/MS results confirmed and augmented observations made with the targeted platform. Higher proline and isoleucine levels were observed in high-FPG mothers in both platforms. The trend toward a higher valine level in the high-FPG group observed for targeted data was confirmed by nontargeted data. While most nontargeted metabolites with statistically significant differences were higher in high-FPG mothers, 1,5-anhydroglucitol was among the few with lower levels for high- vs. low-FPG mothers.

### Pathways

To better define metabolic perturbations in high vs. low FPG mothers, pathway analyses were performed to complement per-metabolite analyses by identifying metabolic pathways that exhibited collective differences in metabolite levels between groups. Collective differences in high- versus low-FPG mothers were observed for 14 unique ULSs (FDR-adjusted  $P < 0.05$  [Supplementary Table 1]). The majority of these ULSs are involved with amino acid metabolism and feed into pathways contributing to proline biosynthesis and degradation as well as leucine, phenylalanine, lysine, and alanine degradation (Supplementary Figure 1). The other ULSs identified in Supplementary Table 1 contribute to carbohydrate and organic acid metabolism.

### Newborn Associations

Exploratory analyses of maternal metabolite levels determined in the targeted assays and newborn phenotypes suggest positive associations for triglycerides, leucine/isoleucine, and arginine with sum of skinfolds, 3-hydroxybutyrate, and arginine with birth weight, as well as triglycerides, lactate, leucine/

**Table 2—Conventional metabolite and targeted amino acid levels and adjusted differences in HAPO mothers with high and low FPG**

|                                 | High FPG (n = 67)     | Low FPG (n = 49)     | High vs. low unadjusted difference in means | High vs. low adjusted difference in means | Nominal P |
|---------------------------------|-----------------------|----------------------|---------------------------------------------|-------------------------------------------|-----------|
| <b>Conventional metabolites</b> |                       |                      |                                             |                                           |           |
| Triglycerides (mg/dL)           | 208.7 ± 86.4 (n = 66) | 149.5 ± 53.7         | 58.5                                        | 63.2                                      | <0.01*    |
| 3-OH butyrate (μmol/L)          | 67.4 ± 57.5           | 36.8 ± 27.8 (n = 48) | 30.6                                        | 24.0                                      | 0.01*     |
| Lactate (mmol/L)                | 2.9 ± 0.9             | 2.7 ± 0.5            | 0.2                                         | 0.3                                       | 0.03      |
| Glycerol (mg/dL)                | 0.7 ± 1.3             | 0.5 ± 0.2            | 0.2                                         | 0.4                                       | 0.05      |
| <b>Amino acids (μmol/L)</b>     |                       |                      |                                             |                                           |           |
| Alanine                         | 372.7 ± 68.2          | 342.0 ± 55.9         | 30.7                                        | 34.9                                      | <0.01*    |
| Proline                         | 137.7 ± 27.5          | 124.0 ± 26.6         | 13.7                                        | 17.3                                      | <0.01*    |
| Glutamine/glutamate             | 119.8 ± 28.5          | 110.6 ± 30.9         | 9.2                                         | 18.6                                      | <0.01*    |
| Arginine                        | 96.7 ± 20.6           | 90.2 ± 15.7          | 6.5                                         | 11.8                                      | <0.01*    |
| Leucine/isoleucine              | 130.7 ± 17.0          | 124.8 ± 17.8         | 5.9                                         | 9.8                                       | <0.01*    |
| Asparagine/aspartate            | 44.0 ± 14.1           | 41.5 ± 8.2           | 2.5                                         | 5.2                                       | 0.01*     |
| Phenylalanine                   | 83.0 ± 20.4           | 79.9 ± 11.2          | 3.1                                         | 6.8                                       | 0.04      |
| Citrulline                      | 19.9 ± 4.0            | 18.2 ± 3.3           | 1.7                                         | 1.4                                       | 0.08      |
| Valine                          | 189.8 ± 26.2          | 181.4 ± 28.3         | 8.4                                         | 9.1                                       | 0.09      |
| Tyrosine                        | 51.9 ± 7.3            | 51.4 ± 7.5           | 0.5                                         | 1.7                                       | 0.26      |
| Ornithine                       | 42.5 ± 9.49           | 45.2 ± 9.2           | −2.7                                        | −1.5                                      | 0.40      |
| Histidine                       | 83.3 ± 16.5           | 81.9 ± 11.6          | 1.4                                         | 2.0                                       | 0.50      |
| Serine                          | 111.5 ± 26.4          | 114.5 ± 18.8         | −3.0                                        | 2.5                                       | 0.55      |
| Methionine                      | 14.8 ± 1.8            | 15.2 ± 1.8           | −0.4                                        | −0.2                                      | 0.58      |
| Glycine                         | 191.5 ± 46.6          | 189.4 ± 31.1         | 2.1                                         | 4.2                                       | 0.60      |

Data are means ± SD unless otherwise indicated. Raw means and SDs are reported for the high- and low-FPG groups. Adjusted mean differences are coefficients from linear regression models using each metabolite as the outcome, high- vs. low-FPG status as the main predictor of interest, and additional adjustment for field center, parity, maternal and gestational age at OGTT, and length of FPG sample storage time. Additional adjustment for maternal BMI and height at OGTT and drinking/smoking status yielded no appreciable difference, and results are not reported. Nominal P values are those corresponding to the linear regression coefficient for high vs. low FPG. \*Values that remain significant with  $P < 0.05$  after collective FDR adjustment (17) for all conventional metabolites and amino acids.

isoleucine, and glutamate with cord C-peptide ( $P < 0.05$ , Table 4). Owing to newborn outcome associations with maternal FPG, adjustment for maternal FPG group attenuated these observations, with only the association of maternal triglycerides and newborn sum of skinfolds and cord C-peptide retaining statistical significance (triglycerides higher by 7.4 and 34.5 mg/dL associated with sum of skinfolds higher by 1 mm,  $P < 0.03$ , and cord C-peptide higher by 1 μg/L,  $P < 0.05$ , respectively). Interestingly, after adjustment for maternal FPG group, maternal glycine levels demonstrated a negative association with cord C-peptide (Table 4). No associations between maternal metabolite levels and cord glucose were observed with  $P < 0.05$  with or without adjustment for maternal FPG group. Multiple metabolites in the nontargeted assays demonstrated association with sum of skinfolds or cord C-peptide, but all of these associations were attenuated after adjustment for maternal FPG group (Supplementary Table 2).

## CONCLUSIONS

Broad-scale characterization of metabolic differences associated with hyperglycemia and insulin resistance during pregnancy is possible given recent developments in metabolomics technology. Two recent metabolomics studies, one using nuclear magnetic resonance spectroscopy and the other liquid chromatography–MS (LC/MS), examined urine from women with GDM compared with healthy pregnant control subjects. In one, GDM women with pronounced hyperglycemia had higher levels of glucose, lysine, and citrate, while a second smaller study found higher levels of choline and a metabolite of leucine (18,19). However, the latter findings were not confirmed in a different study using LC/MS (20). We used targeted and nontargeted GC–MS–based methodologies to identify key metabolites in serum and metabolic pathways associated with hyperglycemia and insulin resistance at ~28 weeks' gestation to gain insights into factors contributing to maternal hyperglycemia. This was done by comparing mothers at

the upper and lower ends of the distribution of FPG and insulin sensitivity. The high-FPG group included pregnant mothers who meet recently adopted IADPSG criteria for GDM, suggesting impaired β-cell function together with insulin resistance (7). To our knowledge, this is the first report using targeted and nontargeted metabolic profiling to characterize serum from hyperglycemic, insulin-resistant mothers during pregnancy and more insulin-sensitive, low-FPG counterparts.

Analyses of conventional metabolites in high- vs. low-FPG mothers confirmed expected differences associated with differences in insulin sensitivity, specifically higher triglyceride and 3-hydroxybutyrate levels, with a similar trend for lactate and glycerol. Pregnancy is characterized by an increase in triglycerides compared with the nonpregnant state, with higher levels in GDM mothers (1). The finding of higher triglyceride levels in the high-FPG group likely reflects, in part, greater insulin resistance and probable impaired

**Table 3—Nontargeted metabolite estimated proportions of present metabolites, estimated mean detected levels, and adjusted differences in HAPO mothers with high and low FPG**

|                                          | Estimated proportion of present metabolites |         | Estimated mean detected metabolite levels |         | High vs. low adjusted difference in means (SE) | FDR-adjusted <i>P</i> |
|------------------------------------------|---------------------------------------------|---------|-------------------------------------------|---------|------------------------------------------------|-----------------------|
|                                          | High FPG                                    | Low FPG | High FPG                                  | Low FPG |                                                |                       |
| <i>n</i>                                 | 67                                          | 49      | 67                                        | 49      |                                                |                       |
| <b>Amino acids</b>                       |                                             |         |                                           |         |                                                |                       |
| Isoleucine                               |                                             |         | 18.70                                     | 18.05   | 0.65 (0.005)                                   | <0.0001               |
| Proline                                  |                                             |         | 18.81                                     | 18.02   | 0.79 (0.005)                                   | <0.0001               |
| Valine                                   |                                             |         | 20.20                                     | 19.51   | 0.69 (0.007)                                   | 0.002                 |
| Alanine                                  |                                             |         | 21.01                                     | 20.67   | 0.33 (0.003)                                   | 0.003                 |
| Leucine                                  | 0.79                                        | 0.79    | 18.88                                     | 18.40   | 0.48 (0.005)                                   | 0.010                 |
| <i>cis/trans</i> -4-Hydroxyproline       |                                             |         | 17.33                                     | 16.98   | 0.35 (0.004)                                   | 0.017                 |
| Serine                                   |                                             |         | 20.55                                     | 20.12   | 0.42 (0.006)                                   | 0.022                 |
| Ornithine                                | 0.42                                        | 0.59    | 17.94                                     | 16.97   | 0.98 (0.020)                                   | 0.036                 |
| Glutamic acid                            |                                             |         | 19.01                                     | 18.50   | 0.51 (0.006)                                   | 0.042                 |
| Threonine                                |                                             |         | 22.15                                     | 21.85   | 0.30 (0.004)                                   | 0.048                 |
| <b>Carbohydrates</b>                     |                                             |         |                                           |         |                                                |                       |
| Glucose and other aldohexoses (1st peak) |                                             |         | 26.07                                     | 25.40   | 0.67 (0.002)                                   | <0.0001               |
| Glucose and other aldohexoses (2nd peak) |                                             |         | 22.09                                     | 21.41   | 0.67 (0.002)                                   | <0.0001               |
| Fructose and other ketohexoses           |                                             |         | 19.93                                     | 19.36   | 0.57 (0.005)                                   | <0.0001               |
| Gluconic acid                            | 0.84                                        | 0.68    | 14.13                                     | 13.47   | 0.66 (0.006)                                   | <0.0001               |
| 1-5-Anhydroglucitol                      |                                             |         | 22.01                                     | 22.56   | −0.55 (0.006)                                  | 0.016                 |
| Threitol and other tetritols             |                                             |         | 17.74                                     | 17.48   | 0.26 (0.003)                                   | 0.016                 |
| Mannitol and other hexitols              | 0.88                                        | 0.96    | 14.59                                     | 16.05   | −1.47 (0.019)                                  | 0.017                 |
| Xylitol and other pentitols              |                                             |         | 16.33                                     | 16.08   | 0.24 (0.004)                                   | 0.048                 |
| <b>Lipids</b>                            |                                             |         |                                           |         |                                                |                       |
| Palmitic acid                            |                                             |         | 23.51                                     | 23.26   | 0.24 (0.002)                                   | 0.003                 |
| Lauric acid                              |                                             |         | 16.57                                     | 16.04   | 0.53 (0.005)                                   | 0.006                 |
| Heptadecanoic acid                       |                                             |         | 17.06                                     | 16.81   | 0.26 (0.003)                                   | 0.010                 |
| β-Sitosterol                             | 0.57                                        | 0.64    | 14.23                                     | 15.19   | −0.96 (0.016)                                  | 0.030                 |
| β-Tocopherol                             | 0.99                                        | 0.87    | 17.03                                     | 16.76   | 0.27 (0.008)                                   | 0.048                 |
| <b>Ketone bodies</b>                     |                                             |         |                                           |         |                                                |                       |
| β-Hydroxybutyric acid                    |                                             |         | 20.98                                     | 20.50   | 0.48 (0.005)                                   | 0.017                 |
| Acetoacetic acid                         | 0.94                                        | 1.00    | 21.43                                     | 21.23   | 0.19 (0.002)                                   | 0.046                 |
| <b>Organic acids</b>                     |                                             |         |                                           |         |                                                |                       |
| Pyruvic acid                             | 0.97                                        | 0.90    | 19.34                                     | 18.83   | 0.51 (0.006)                                   | 0.017                 |
| α-Ketoglutaric acid                      | 0.80                                        | 0.77    | 16.16                                     | 15.56   | 0.61 (0.008)                                   | 0.036                 |
| 2-Hydroxybutyric acid                    |                                             |         | 19.14                                     | 18.85   | 0.28 (0.004)                                   | 0.036                 |
| Isocitric acid                           |                                             |         | 19.50                                     | 19.19   | 0.31 (0.005)                                   | 0.047                 |
| Creatinine                               |                                             |         | 18.49                                     | 18.07   | 0.43 (0.006)                                   | 0.042                 |

All nontargeted metabolite levels were analyzed using a mixture model approach (13). For metabolites with at least five samples indicating either absence or presence below detectability, estimated proportions of metabolites present are reported for the high- and low-FPG groups. Proportions are not estimated for metabolites with fewer than five such observations. Reported mean differences for high- vs. low-FPG status are adjusted for field center, parity, maternal and gestational age at OGTT, and FPG sample storage time and include bootstrap SE estimates. Estimated means in the high- and low-FPG groups from the continuous portion of the mixture model are reported for the referent categories (U.S. field centers, first child) and at mean values for maternal and gestational age at OGTT and FPG sample storage time. Adjusted mean metabolite levels, and when applicable estimated presence proportions, are jointly compared for high- vs. low-FPG mothers using a likelihood ratio  $\chi^2$  test for the mixture model resulting in the reported FDR adjusted *P* values (17).

insulin secretion in this group. Insulin resistance may have also contributed to the higher lactate and 3-hydroxybutyrate levels, as a recent population-based study in nonpregnant individuals reported association of these metabolites with insulin sensitivity (21). The higher level of lactate in the high-FPG group is also consistent with its role as a substrate for gluconeogenesis.

Pregnancy is also characterized by hypoaminoacidemia with marked decreases in gluconeogenic amino acids with fasting during pregnancy (2). Previous studies have demonstrated differences in levels of specific amino acids between GDM and non-GDM mothers (22–24). Consistent with findings in some but not all studies of women with GDM (23,24), we found higher alanine levels in high- versus

low-FPG mothers, consistent with alanine being a major substrate for gluconeogenesis in the setting of maternal hyperglycemia. Higher levels of proline, glutamine/glutamate, and asparagine/aspartate were also present in the high-FPG mothers, consistent with recent population-based and other studies in nonpregnant cohorts that demonstrated association of higher levels of these amino acids with glucose

**Table 4—Exploratory associations between HAPO newborn characteristics and maternal FPG targeted metabolite levels at 28 weeks' gestation**

| Newborn characteristics and metabolites                          | <i>n</i> | Newborn association without adjustment for maternal high- vs. low-FPG group: $\beta$ ( <i>P</i> ) | Newborn association including adjustment for maternal high- vs. low-FPG group: $\beta$ ( <i>P</i> ) |
|------------------------------------------------------------------|----------|---------------------------------------------------------------------------------------------------|-----------------------------------------------------------------------------------------------------|
| <b>Newborn sum of skinfolds (per 1 mm)</b>                       |          |                                                                                                   |                                                                                                     |
| Triglycerides (mg/dL)                                            | 92       | 11.4 (<0.01)                                                                                      | 7.4 (0.03)                                                                                          |
| Leucine/isoleucine ( $\mu\text{mol/L}$ )                         | 93       | 1.4 (0.05)                                                                                        | 0.8 (0.31)                                                                                          |
| Arginine ( $\mu\text{mol/L}$ )                                   | 93       | 1.7 (0.02)                                                                                        | 0.9 (0.29)                                                                                          |
| <b>Newborn birth weight (per 100 g)</b>                          |          |                                                                                                   |                                                                                                     |
| 3-OH butyrate ( $\mu\text{mol/L}$ )                              | 115      | 1.9 (0.04)                                                                                        | 1.2 (0.19)                                                                                          |
| Arginine ( $\mu\text{mol/L}$ )                                   | 116      | 0.7 (0.04)                                                                                        | 0.4 (0.30)                                                                                          |
| <b>Newborn cord C-peptide (per 1 <math>\mu\text{g/L}</math>)</b> |          |                                                                                                   |                                                                                                     |
| Triglycerides (mg/dL)                                            | 100      | 54.3 (<0.001)                                                                                     | 34.5 (0.05)                                                                                         |
| Lactate (mmol/L)                                                 | 101      | 0.3 (0.04)                                                                                        | 0.2 (0.26)                                                                                          |
| Leucine/isoleucine ( $\mu\text{mol/L}$ )                         | 101      | 7.1 (0.03)                                                                                        | 4.1 (0.29)                                                                                          |
| Glutamine/glutamate ( $\mu\text{mol/L}$ )                        | 101      | 11.5 (0.03)                                                                                       | 4.0 (0.50)                                                                                          |
| Glycine ( $\mu\text{mol/L}$ )                                    | 101      | −10.8 (0.16)                                                                                      | −18.6 (0.04)                                                                                        |

Linear model parameter estimates ( $\beta$ ) for continuous associations between targeted metabolites with HAPO newborn characteristics (sum of skinfolds, birth weight, and cord C-peptide). Estimates of  $\beta$  represent a higher amount of the metabolite per newborn sum of skinfolds higher by 1 mm, newborn birth weight higher by 100 g, or cord C-peptide higher by 1  $\mu\text{g/L}$ . All estimates are adjusted for field center, parity, maternal and gestational age at OGTT, and length of FPG sample storage time. Estimates of  $\beta$  and nominal *P* values are reported for associations with newborn characteristics both with and without adjustment for maternal high- vs. low-FPG group.

levels, insulin resistance, or obesity (21,25,26).

An area of increasing interest is the role of branched-chain amino acids (BCAAs) in insulin resistance, hyperglycemia, and type 2 diabetes—an association first noted >30 years ago (25,27). More recent cohort and/or population-based studies have demonstrated association of BCAA levels with insulin resistance, higher glucose levels, and changes in insulin resistance and glucose homeostasis after weight loss (21,25,26,28,29), while higher levels of BCAAs are present in type 2 diabetic subjects compared with control subjects (30,31) and are part of a metabolic signature that predicts incident type 2 diabetes (26,32,33). Some, but not all, prior studies have demonstrated higher levels of BCAAs in GDM (22–24). In the current study, the targeted and nontargeted analyses demonstrated higher levels of BCAA in high-FPG mothers, consistent with findings in nonpregnant populations and suggestive of similarities between hyperglycemia and insulin resistance and its consequences in pregnant and nonpregnant populations.

Pathway analyses using nontargeted data also suggested differences in amino acid metabolism between the high- and low-FPG groups, including altered degradation of proline,

phenylalanine, lysine, leucine, and alanine. Taken together, the data in the current study have now extended previously reported associations in nonpregnant populations by demonstrating that, during pregnancy, greater insulin resistance together with hyperglycemia, reflecting accompanying impaired insulin secretion, is associated with levels of multiple amino acids and altered activity of amino acid degradation pathways. As amino acids are actively transported from the mother across the placenta and placental amino acid exchange may be altered in GDM (2,23), alterations in placental transport may also contribute to differences in amino acid levels between the high- and low-FPG group.

Previous metabolomics studies of insulin resistance focused largely on obese, insulin-resistant compared with lean, insulin-sensitive individuals (25,28,29). The novelty of the current study is that, while BMI was similar between high- and low-FPG groups, the high-FPG group with greater pregnancy-induced insulin resistance exhibited evidence for amino acid differences similar to those observed in obese, insulin-resistant individuals. The persistence of these amino acid differences suggests they are characteristic of insulin resistance independent of obesity. As the

hyperglycemic mothers also met new criteria for GDM, some degree of  $\beta$ -cell dysfunction and impaired insulin secretion also may have contributed to observed differences between groups. In HAPO, maternal obesity and hyperglycemia appeared to have independent effects on newborn outcomes (34). Determining whether maternal obesity in the absence of hyperglycemia leads to changes in the metabolic profile similar to or different than those associated with high glucose levels and insulin resistance will require future studies.

Another novel aspect of the current study is inclusion of nontargeted metabolomics profiling of high- versus low-FPG mothers. As expected based on calculated insulin sensitivity in the high- versus low-FPG groups, nontargeted GC/MS data together with targeted analyses demonstrated a metabolic profile consistent with insulin resistance and, possibly, impaired insulin secretion in the high-FPG group. This included higher levels of gluconate (perhaps reflecting hyperglycemic excursions and increased oxidative stress), free fatty acids (indicative of impaired suppression of lipolysis by insulin), by-products of fatty acid oxidation (ketones and tricarboxylic acid cycle intermediates), multiple amino acids, and fructose, pentitols, and hexitols.

Simultaneous elevation in triglycerides, gluconeogenic precursors, and assorted sugars is consistent with a recent description of insulin resistance “selective” for failure to suppress gluconeogenesis but with normal anabolic effects of insulin on lipogenesis in liver (35).

Among the few nontargeted analytes with significantly lower levels in high-versus low-FPG mothers in the current study was 1,5-anhydroglucitol. Fluctuation of 1,5-anhydroglucitol in response to hyperglycemic excursions has been reported, with lower levels in diabetic subjects with poor glycemic control, ostensibly because glucose competes with 1,5-anhydroglucitol for renal uptake (36). Among pregnant women with type 1 diabetes, 1,5-anhydroglucitol levels are highly correlated with glucose levels determined by continuous glucose monitoring and, in the third trimester, the best predictor of macrosomia (37). The nontargeted assays suggest that 1,5-anhydroglucitol may also have clinical utility as a marker of maternal hyperglycemia in pregnancy.

The current study was not specifically designed to examine the impact of maternal metabolites on newborn outcomes, but exploratory analyses were conducted. Arginine, leucine/isoleucine, glutamine, 3-hydroxybutyrate, lactate, and triglycerides demonstrated trends toward association with cord C-peptide, birth weight, or sum of skinfolds (a measure of newborn adiposity) in targeted assays. In the nontargeted assays, a variety of sugars and their degradation products also demonstrated trends toward association with sum of skinfolds or cord C-peptide levels. Only association of maternal triglycerides with cord C-peptide levels and neonatal sum of skinfolds remained significant after adjustment for maternal FPG group, although in the current study sum of skinfolds did not differ in the offspring despite the higher birth weight in offspring of the high-FPG group. These data are consistent with the suggested role of triglycerides on fetal size at birth in the settings of normal glucose tolerance and GDM (38,39).

Interestingly, maternal glycine demonstrated negative association with cord C-peptide after adjustment for maternal FPG group, consistent with glycine’s negative association with insulin resistance in nonpregnant populations (40).

This study had numerous strengths. The HAPO Study was population based, and the large number of participants allowed for select groups to be identified for study. Moreover, HAPO used a common protocol and data collection instruments, uniform training of personnel, and a central laboratory for analyses to ensure consistency of results. One limitation of a large study is that limited measures were obtainable; e.g., measures of maternal body fat and its distribution are not available. An additional limitation is that findings of nontargeted assays require development of specific targeted assays for metabolites of interest to confirm findings. Finally, the current study examined women from the upper and lower ends of the distribution of FPG. Future studies will need to examine women across the continuum of glucose levels to confirm the reported findings and more fully characterize the maternal metabolome and its impact on newborn outcomes.

The mechanisms underlying maternal insulin resistance and its metabolic consequences remain incompletely defined. The current study provides new data about the metabolic profile characteristic of maternal hyperglycemia and suggests a role for amino acids in insulin resistance and hyperglycemia during pregnancy, similar to nonpregnant populations. As the current study is an initial investigation comparing upper and lower ends of the FPG and insulin sensitivity distribution, differences between the two groups may reflect not only insulin resistance and  $\beta$ -cell dysfunction in the high-FPG group but also potentially a lesser degree of pregnancy-induced insulin resistance in the low-FPG group. Future population-based studies examining pregnant women across the full continuum of glucose levels, insulin sensitivity, and BMI will provide opportunity to more fully characterize metabolic profiles

associated with maternal hyperglycemia, insulin resistance, and obesity and their association with newborn outcomes. This initial investigation demonstrates broad-scale metabolic differences associated with hyperglycemia and insulin resistance in pregnancy that help to provide insight into the underlying mechanisms and metabolic consequences of pregnancy-induced insulin resistance and identify potential new markers of maternal hyperglycemia.

**Acknowledgments.** The authors thank Stephan Baumann and Dr. Steven Fischer at Agilent Technologies, Inc., for assistance in developing the nontargeted GC/MS platform.

**Funding.** This study was funded by grants R01-HD34242 and R01-HD34243 from the National Institute of Child Health and Human Development and the National Institute of Diabetes and Digestive and Kidney Diseases, by the National Center for Research Resources (M01-RR00048, M01-RR00080), by the National Institute on Aging (P30-AG028716), and by the American Diabetes Association and Friends of Prentice.

**Duality of Interest.** No potential conflicts of interest relevant to this article were reported.

**Author Contributions.** D.M.S. contributed to the study design, data analysis, and interpretation of findings and primary drafting of the manuscript. M.J.M. was responsible for assays of conventional metabolites and nontargeted metabolomics, interpretation of findings, and manuscript writing. N.R.D. contributed to data analysis. R.D.S. developed and performed targeted metabolomics assays. A.R.D. contributed to study design and statistical modeling. L.P.L. contributed to study design. B.E.M. contributed to study design and interpretation of findings. C.B.N. contributed to study design, interpretation of findings, and manuscript writing. J.R.B. was responsible for assays of conventional metabolites and nontargeted metabolomics, interpretation of findings, and manuscript writing. W.L.L. conceived the hypothesis and contributed to study design, interpretation of findings, and manuscript writing. D.M.S. and W.L.L. are the guarantors of this work and, as such, had full access to all the data in the study and take responsibility for the integrity of the data and the accuracy of the data analysis.

**Prior Presentation.** Parts of this study were presented in abstract form at the 72nd Scientific Sessions of the American Diabetes Association, Philadelphia, Pennsylvania, 8–12 June 2012.

## References

- Butte NF. Carbohydrate and lipid metabolism in pregnancy: normal compared with gestational diabetes



- mellitus. *Am J Clin Nutr* 2000;71(Suppl.):1256S–1261S
2. Hadden DR, McLaughlin C. Normal and abnormal maternal metabolism during pregnancy. *Semin Fetal Neonatal Med* 2009;14:66–71
  3. Buchanan TA, Xiang AH. Gestational diabetes mellitus. *J Clin Invest* 2005;115:485–491
  4. Desoye G, Hauguel-de Mouzon S. The human placenta in gestational diabetes mellitus. The insulin and cytokine network. *Diabetes Care* 2007;30(Suppl. 2):S120–S126
  5. Bain JR, Stevens RD, Wenner BR, Ilkayeva O, Muoio DM, Newgard CB. Metabolomics applied to diabetes research: moving from information to knowledge. *Diabetes* 2009;58:2429–2443
  6. Metzger BE, Lowe LP, Dyer AR, et al.; HAPO Study Cooperative Research Group. Hyperglycemia and adverse pregnancy outcomes. *N Engl J Med* 2008;358:1991–2002
  7. Metzger BE, Gabbe SG, Persson B, et al.; International Association of Diabetes and Pregnancy Study Groups Consensus Panel. International association of diabetes and pregnancy study groups recommendations on the diagnosis and classification of hyperglycemia in pregnancy. *Diabetes Care* 2010;33:676–682
  8. HAPO Study Cooperative Research Group. The Hyperglycemia and Adverse Pregnancy Outcome (HAPO) Study. *Int J Gynaecol Obstet* 2002;78: 69–77
  9. Radaelli T, Farrell KA, Huston-Presley L, et al. Estimates of insulin sensitivity using glucose and C-Peptide from the hyperglycemia and adverse pregnancy outcome glucose tolerance test. *Diabetes Care* 2010;33:490–494
  10. Lien LF, Haqq AM, Arlotto M, et al. The STEDMAN project: biophysical, biochemical and metabolic effects of a behavioral weight loss intervention during weight loss, maintenance, and regain. *OMICS* 2009;13: 21–35
  11. Kind T, Wohlgemuth G, Lee Y, et al. FiehnLib: mass spectral and retention index libraries for metabolomics based on quadrupole and time-of-flight gas chromatography/mass spectrometry. *Anal Chem* 2009;81:10038–10048
  12. Halket JM, Przyborowska A, Stein SE, Mallard WG, Down S, Chalmers RA. Deconvolution gas chromatography/mass spectrometry of urinary organic acids—potential for pattern recognition and automated identification of metabolic disorders. *Rapid Commun Mass Spectrom* 1999;13:279–284
  13. Moulton LH, Halsey NA. A mixture model with detection limits for regression analyses of antibody response to vaccine. *Biometrics* 1995;51:1570–1578
  14. Morgat A, Coissac E, Coudert E, et al. UniPathway: a resource for the exploration and annotation of metabolic pathways. *Nucleic Acids Res* 2012;40:D761–D769
  15. Wohlgemuth G, Haldiya PK, Willighagen E, Kind T, Fiehn O. The Chemical Translation Service—a web-based tool to improve standardization of metabolomic reports. *Bioinformatics* 2010;26:2647–2648
  16. Goeman JJ, van de Geer SA, de Kort F, van Houwelingen HC. A global test for groups of genes: testing association with a clinical outcome. *Bioinformatics* 2004;20:93–99
  17. Benjamini Y, Hochberg Y. Controlling the false discovery rate: a practical and powerful approach to multiple testing. *J R Stat Soc B* 1995;57:289–300
  18. Diaz SO, Pinto J, Graça G, et al. Metabolic biomarkers of prenatal disorders: an exploratory NMR metabolomics study of second trimester maternal urine and blood plasma. *J Proteome Res* 2011;10:3732–3742
  19. Graça G, Goodfellow BJ, Barros AS, et al. UPLC-MS metabolic profiling of second trimester amniotic fluid and maternal urine and comparison with NMR spectral profiling for the identification of pregnancy disorder biomarkers. *Mol Biosyst* 2012;8: 1243–1254
  20. Sachse D, Sletner L, Mørkrid K, et al. Metabolic changes in urine during and after pregnancy in a large, multiethnic population-based cohort study of gestational diabetes. *PLoS One* 2012;7:e52399
  21. Würtz P, Mäkinen VP, Soininen P, et al. Metabolic signatures of insulin resistance in 7,098 young adults. *Diabetes* 2012;61: 1372–1380
  22. Kalhan SC. Protein metabolism in pregnancy. *Am J Clin Nutr* 2000;71(Suppl.): 1249S–1255S
  23. Cetin I, de Santis MS, Taricco E, et al. Maternal and fetal amino acid concentrations in normal pregnancies and in pregnancies with gestational diabetes mellitus. *Am J Obstet Gynecol* 2005;192: 610–617
  24. Metzger BE, Phelps RL, Freinkel N, Navickas IA. Effects of gestational diabetes on diurnal profiles of plasma glucose, lipids, and individual amino acids. *Diabetes Care* 1980;3:402–409
  25. Newgard CB. Interplay between lipids and branched-chain amino acids in development of insulin resistance. *Cell Metab* 2012;15:606–614
  26. Stancáková A, Civelek M, Saleem NK, et al. Hyperglycemia and a common variant of GCKR are associated with the levels of eight amino acids in 9,369 Finnish men. *Diabetes* 2012;61:1895–1902
  27. Adeva MM, Calviño J, Souto G, Donapetry C. Insulin resistance and the metabolism of branched-chain amino acids in humans. *Amino Acids* 2012;43:171–181
  28. Laferrère B, Reilly D, Arias S, et al. Differential metabolic impact of gastric bypass surgery versus dietary intervention in obese diabetic subjects despite identical weight loss. *Sci Transl Med* 2011;3:80re2
  29. Shah SH, Crosslin DR, Haynes CS, et al. Branched-chain amino acid levels are associated with improvement in insulin resistance with weight loss. *Diabetologia* 2012;55:321–330
  30. Fiehn O, Garvey WT, Newman JW, Lok KH, Hoppel CL, Adams SH. Plasma metabolomic profiles reflective of glucose homeostasis in non-diabetic and type 2 diabetic obese African-American women. *PLoS One* 2010; 5:e15234
  31. Suhre K, Meisinger C, Döring A, et al. Metabolic footprint of diabetes: a multiplatform metabolomics study in an epidemiological setting. *PLoS One* 2010;5: e13953
  32. Wang TJ, Larson MG, Vasan RS, et al. Metabolite profiles and the risk of developing diabetes. *Nat Med* 2011;17: 448–453
  33. Rhee EP, Cheng S, Larson MG, et al. Lipid profiling identifies a triacylglycerol signature of insulin resistance and improves diabetes prediction in humans. *J Clin Invest* 2011;121:1402–1411
  34. Catalano PM, McIntyre HD, Cruickshank JK, et al.; HAPO Study Cooperative Research Group. The hyperglycemia and adverse pregnancy outcome study: associations of GDM and obesity with pregnancy outcomes. *Diabetes Care* 2012;35:780–786
  35. Brown MS, Goldstein JL. Selective versus total insulin resistance: a pathogenic paradox. *Cell Metab* 2008;7:95–96
  36. Kim KJ, Lee BW. The roles of glycosylated albumin as intermediate glycation index and pathogenic protein. *Diabetes Metab J* 2012;36:98–107
  37. Nowak N, Skupien J, Cyganek K, Matejko B, Malecki MT. 1,5-Anhydroglucitol as a marker of maternal glycaemic control and predictor of neonatal birthweight in pregnancies complicated by type 1 diabetes mellitus. *Diabetologia* 2013;56:709–713
  38. Di Cianni G, Miccoli R, Volpe L, et al. Maternal triglyceride levels and newborn weight in pregnant women with normal glucose tolerance. *Diabet Med* 2005;22: 21–25
  39. Schaefer-Graf UM, Graf K, Kulbacka I, et al. Maternal lipids as strong determinants of fetal environment and growth in pregnancies with gestational diabetes mellitus. *Diabetes Care* 2008;31:1858–1863
  40. Gall WE, Beebe K, Lawton KA, et al.; RISC Study Group.  $\alpha$ -hydroxybutyrate is an early biomarker of insulin resistance and glucose intolerance in a nondiabetic population. *PLoS One* 2010;5:e10883
